# Supplementary material
Source: MDPI journal article supplement (https://www.mdpi.com/2071-1050/15/8/6572)
Supplement: s1 [file s1 › sustainability-2232135-supplementary.pdf]

## Supplementary

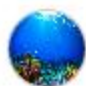

Marine Animals Foundation

Yesterday at 4:45am • 🌐

Imagine that you are a hungry dolphin who hasn't eaten for days. Imagine you finally see a jellyfish-like creature flowing in the ocean and rush to enjoy your "food". You devoured the "food" and felt relieved that you finally have caught something to eat. However, the "food" is not tasty at all. It actually tastes like chemicals and it is hard to chew. Then you start to feel the "food" getting stuck in your throat and causing your stomach to hurt. Eventually, you realized the "food" is actually a plastic bag dumped by humans.

Plastic bags hurt marine animals. However, you CAN save the lives of dolphins and other sea creatures and protect their environment by reducing plastic bag use. Next time you go shopping, RECYCLE your plastic bags at stores (e.g., Publix, Walmart, CVS, etc.) or bring your own REUSABLE bag!

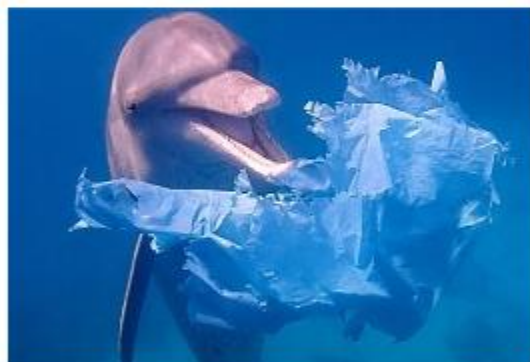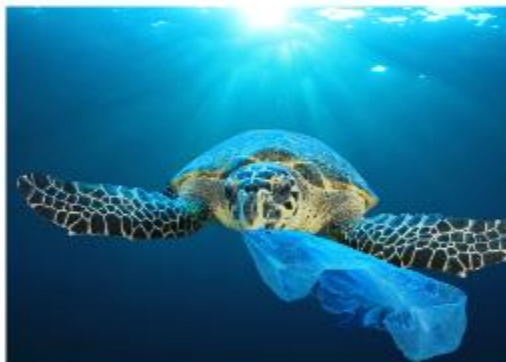

**Recycle Plastic Bags & Use Reuseable Bags!**

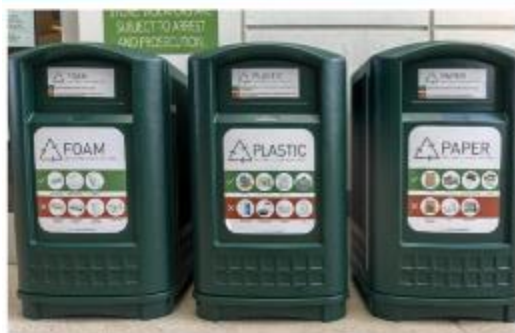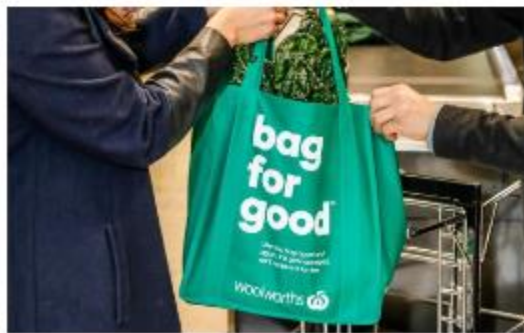

Figure S1. Mock post stimuli for perspective-taking x high self-efficacy condition.

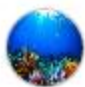

Marine Animals Foundation

Yesterday at 4:45am • 🌐

Imagine that you are a hungry dolphin who hasn't eaten for days. Imagine you finally see a jellyfish-like creature flowing in the ocean and rush to enjoy your "food". You devoured the "food" and felt relieved that you finally have caught something to eat. However, the "food" is not tasty at all. It actually tastes like chemicals and it is hard to chew. Then you start to feel the "food" getting stuck in your throat and causing your stomach to hurt. Eventually, you realized the "food" is actually a plastic bag dumped by humans.

Plastic bags hurt marine animals. Even if you think you CAN'T do it, reducing plastic bag use is important. Starting TODAY, don't use plastic bags EVER again!!!

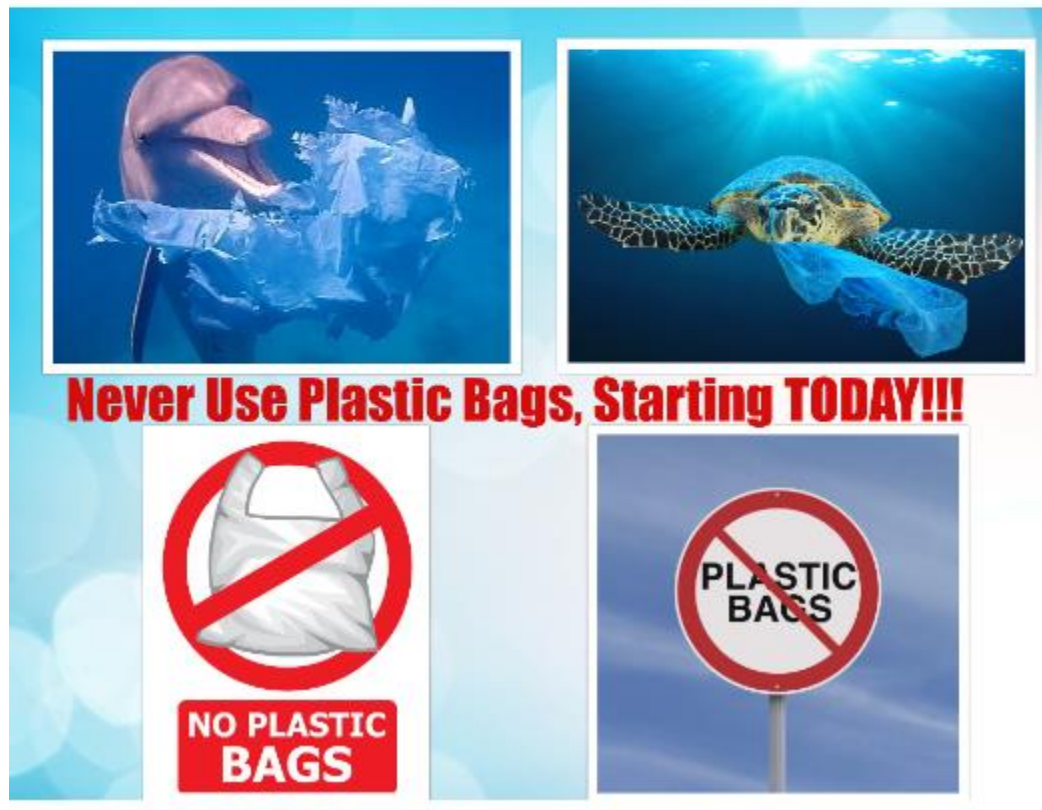

Figure S2. Mock post stimuli for perspective-taking x low self-efficacy condition.

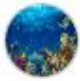

Marine Animals Foundation

...

Yesterday at 4:45am • 🌐

Marine animals such as dolphins, sea turtles, and sea lions often mistake floating plastic bags for food. These plastic bags can cause them to choke, cause internal injuries, or kill them.

Even if you think you CAN'T do it, reducing plastic bag use is important. Starting TODAY, don't use plastic bags EVER again!!!

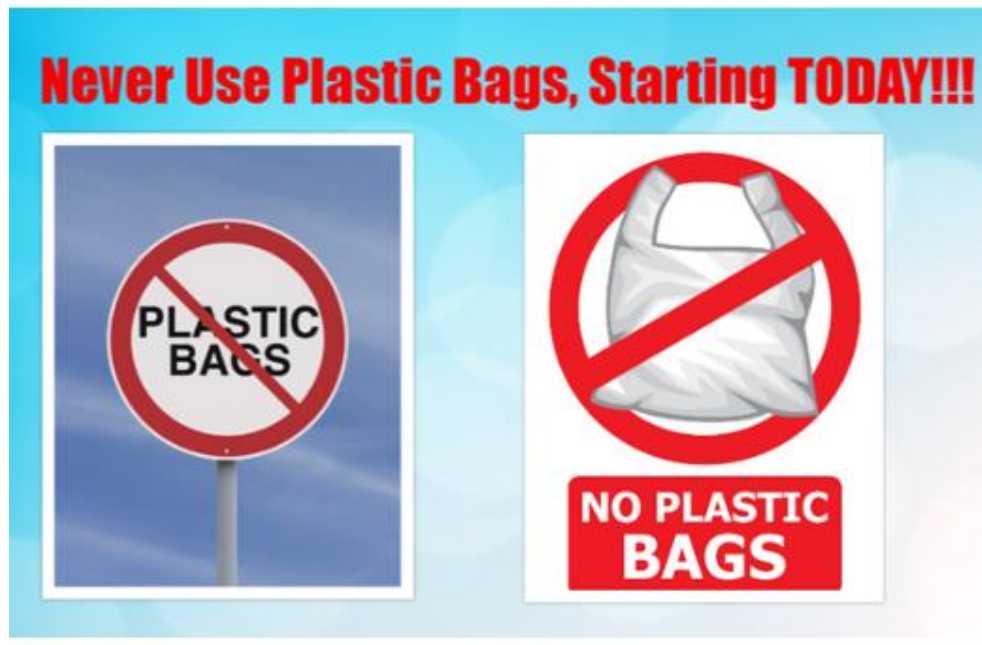

Figure S3. Mock post stimuli for non-perspective-taking x low self-efficacy condition.

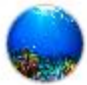

Marine Animal Foundations

Yesterday at 4:45am · 🌐

Marine animals such as dolphins, sea turtles, and sea lions often mistake floating plastic bags for food. These plastic bags can cause them to choke, cause internal injuries, or kill them.

However, you CAN save the lives of dolphins and other sea creatures and protect their environment by reducing plastic bag use. Next time you go shopping, RECYCLE your plastic bags at stores (e.g., Publix, Walmart, CVS, etc.) or bring your own REUSABLE bag!

## Recycle Plastic Bags & Use Reuseable Bags!

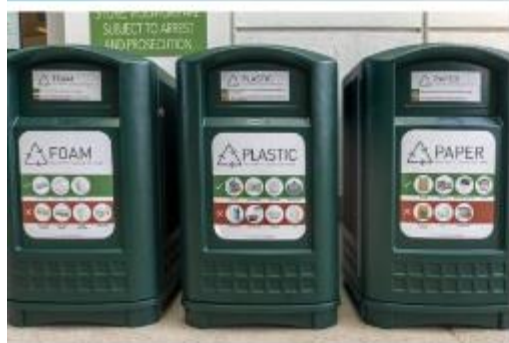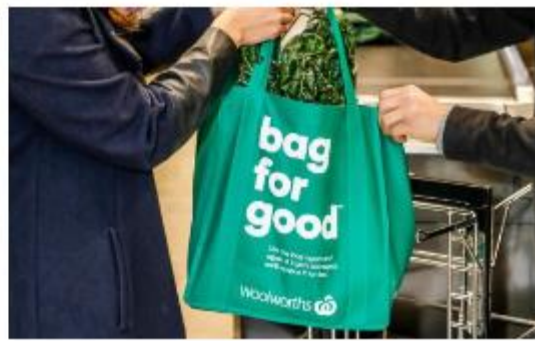

Figure S4. Mock post stimuli for non-perspective-taking x high self-efficacy condition.
